# Supplementary material
Source: PubMed Central journal article supplement (PMC5749592)
Supplement: ry161458suppa1.pdf [file ry161458suppa1.pdf]

**Table E1. Radiologic Features**

| Feature Category and Name      | Scoring Levels                                                                        |
|--------------------------------|---------------------------------------------------------------------------------------|
| Continuous features            |                                                                                       |
| Longest axial diameter         | Millimeters                                                                           |
| Longest perpendicular diameter | Millimeters                                                                           |
| Binary features                |                                                                                       |
| Fissure attachment             | 0: Absence; 1: presence                                                               |
| Pleural attachment             | 0: Absence; 1: presence                                                               |
| Bubblelike lucency/cavitation  | 0: Absence; 1: presence                                                               |
| Air bronchogram                | 0: Absence; 1: presence                                                               |
| Calcification                  | 0: Absence; 1: presence                                                               |
| Attachment to vessel           | 0: Absence; 1: presence                                                               |
| Pleural retraction             | 0: Absence; 1: presence                                                               |
| Lobulation                     | 0: Absence; 1: presence                                                               |
| Spiculation                    | 0: Absence; 1: presence                                                               |
| Concavity                      | 0: Absence; 1: presence                                                               |
| Ordinal scale features         |                                                                                       |
| Location                       | 1: RUL; 2: RML; 3: RLL; 4: LUL; 5: LLL                                                |
| Attenuation pattern            | 1: GGO; 2: part-solid; 3: solid                                                       |
| Perinodule fibrosis            | 1: No/slight; 2: moderate; 3: severe                                                  |
| Perinodule emphysema           | 0: Normal; 1: < 25% affected; 2: < 50% affected; 3: < 75% affected; 4: ≥ 75% affected |
| Total emphysema                | Range from 0 to 24                                                                    |
| Shape                          | 1: Round/oval; 2: irregular                                                           |
| Border definition              | 1: Well-defined 2: poorly defined                                                     |

Note.—GGO = ground-glass opacity, LLL = left lower lung, LUL = left upper lung, RLL = right lower lung, RML, right middle lung, RUL = right upperlung.

**Table E2. Interobserver Agreement**

| Feature                | Range |      | Observed Agreement | Random Agreement | $\kappa$ Value | $\kappa$ Error | 95% CI |       |
|------------------------|-------|------|--------------------|------------------|----------------|----------------|--------|-------|
|                        | Low   | High |                    |                  |                |                | Low er | Upper |
| F1: location           | 1     | 5    | 1                  | 0.240            | 1              | 0              | 1      | 1     |
| F2: distribution       | 0     | 1    | 1                  | 1                | NC             | NC             | NC     | NC    |
| F3: fissure attachment | 0     | 1    | 1                  | 0.820            | 1              | 0              | 1      | 1     |
| F4: pleural attachment | 0     | 1    | 1                  | 0.905            | 1              | 0              | 1      | 1     |
| F5: long axis (cm)     | 0     | 0    | 0                  | 0                | 0              | 0              | 0      | 0     |
| F6: short axis (cm)    | 0     | 0    | 0                  | 0                | 0              | 0              | 0      | 0     |
| F7: size               | 1     | 5    | 1                  | 0.861            | 1              | 0              | 1      | 1     |
| F8: contour            | 1     | 4    | 0.8                | 0.311            | 0.709          | 0.093          | 0.529  | 0.889 |
| F9: lobulation         | 1     | 4    | 0.8                | 0.593            | 0.507          | 0.156          | 0.203  | 0.813 |
| F10: concavity         | 1     | 3    | 0.825              | 0.520            | 0.635          | 0.125          | 0.390  | 0.881 |
| F11: border definition | 1     | 3    | 0.825              | 0.397            | 0.709          | 0.099          | 0.514  | 0.905 |

|                                                |   |   |       |       |       |       |        |       |
|------------------------------------------------|---|---|-------|-------|-------|-------|--------|-------|
| F12: spiculation                               | 1 | 3 | 0.925 | 0.750 | 0.699 | 0.167 | 0.372  | 1.027 |
| F13: texture                                   | 1 | 3 | 0.975 | 0.548 | 0.944 | 0.054 | 0.837  | 1.052 |
| F14: air bronchogram                           | 0 | 1 | 1     | 0.861 | 1     | 0     | 1      | 1     |
| F15: cavitation                                | 0 | 1 | 1     | 0.745 | 1     | 0     | 1      | 1     |
| F16: calcification                             | 0 | 1 | 1     | 1     | NC    | NC    | NC     | NC    |
| F17: vascular convergence                      | 0 | 1 | 0.95  | 0.903 | 0.480 | 0.358 | -0.221 | 1.182 |
| F18: thickened adjacent bronchovascular bundle | 0 | 1 | 1     | 0.951 | 1     | 0     | 1      | 1     |
| F19: pleural retraction                        | 0 | 1 | 1     | 0.861 | 1     | 0     | 1      | 1     |
| F20: perinodule emphysema                      | 1 | 3 | 0.8   | 0.648 | 0.430 | 0.180 | 0.078  | 0.784 |
| F21: perinodule fibrosis                       | 1 | 3 | 0.875 | 0.441 | 0.776 | 0.094 | 0.592  | 0.959 |
| F22: nodules in primary tumor lobe             | 0 | 1 | 1     | 0.711 | 1     | 0     | 1      | 1     |
| F23: nodules in nontumor lobes                 | 0 | 1 | 0.875 | 0.500 | 0.75  | 0.105 | 0.545  | 0.955 |
| F24: lymphadenopathy                           | 0 | 1 | 0.95  | 0.861 | 0.639 | 0.248 | 0.153  | 1.126 |

Note.—NC = not calculable.

**Table E3. Interobserver Agreement (Study 2)**

| Feature                        | Observed Agreement (%) |
|--------------------------------|------------------------|
| Longest axial diameter         | 30.0                   |
| Longest perpendicular diameter | 26.7                   |
| Fissure attachment             | 80.0                   |
| Pleural attachment             | 70.0                   |
| Bubblelike lucency             | 93.3                   |
| Air brochogram                 | 90.0                   |
| Pleural retraction             | 63.3                   |
| Lobulation                     | 80.0                   |
| Spiculation                    | 76.7                   |
| Concavity                      | 70.0                   |
| Attenuation pattern            | 43.3                   |
| Perinodule fibrosis            | 43.3                   |
| Concavity                      | 70.0                   |
| Shape                          | 73.3                   |
| Border definition              | 66.7                   |
| Nodule location                | 70.0                   |
| Attachment to vessel           | 60.0                   |
| Perinodule emphysema           | 50.0                   |
